# Supplementary material
Source: MDPI journal article supplement (https://www.mdpi.com/2073-4433/11/9/902)
Supplement: s1 [file s1]

# Coproducing Weather Forecast Information with and for Smallholder Farmers in Ghana: Evaluation and Design Principles

Talardia Gbangou <sup>1,\*</sup>, Rebecca Sarku <sup>2</sup>, Erik Van Slobbe <sup>1</sup>, Fulco Ludwig <sup>1</sup>, Gordana Kranjac-Berisavljevic <sup>3</sup> and Spyridon Paparrizos <sup>1</sup>

<sup>1</sup> Water Systems and Global Change Group, Wageningen University & Research, P.O. Box 47, 6700 AA Wageningen, The Netherlands; [erik.vanslobbe@wur.nl](mailto:erik.vanslobbe@wur.nl) (E.V.S.); [fulco.ludwig@wur.nl](mailto:fulco.ludwig@wur.nl) (F.L.); [spyros.paparrizos@wur.nl](mailto:spyros.paparrizos@wur.nl) (S.P.)

<sup>2</sup> Public Administration and Policy, Wageningen University and Research, P.O. Box 8130, 6700 EW Wageningen, The Netherlands; [rebecca.sarku@wur.nl](mailto:rebecca.sarku@wur.nl)

<sup>3</sup> Department of Agricultural Mechanization and Irrigation Technology, University for Development Studies, Box TL 1350, Tamale, Ghana; [novagordanak@gmail.com](mailto:novagordanak@gmail.com)

\* Correspondence: [talardia.gbangou@wur.nl](mailto:talardia.gbangou@wur.nl)

Received: 16 July 2020; Accepted: 11 August 2020; Published: date

## 1. Summary of Local Forecast Indicators for Daily Rainfall Forecast in the WeatherApp [29]

**Table S1.** List of the local forecast indicators for the daily rainfall forecast at Ada East district used in the WeatherApp (adapted from [29]).

| Indicators Name                  | Indicator' Signal Used for Daily Rainfall Prediction                                                     |
|----------------------------------|----------------------------------------------------------------------------------------------------------|
| Wind                             | When strong winds blow from the sea (usually from West to East direction)                                |
|                                  | When the wind is blowing from the sea carrying dust (West-East direction) with high intensity of the sun |
| Halo (around the Sun)            | If at sunset there is a red circle around the sun                                                        |
| Sun                              | If high intensity of sunshine is observed                                                                |
|                                  | If high intensity of sunshine and dust-wind blowing (from West to East) is observed                      |
| Bird (Torle, Ploceus cucullatus) | Make a lot of sounds                                                                                     |
| Frog                             | When frogs start croaking a lot                                                                          |
| Pig                              | When pigs catch the grass and turning around it                                                          |
| Moon (distribution)              | When the moon shape is curved such that the shadow is on the left side                                   |
|                                  | When the moon shape is curved such that the shadow is on the right side                                  |
|                                  | When the moon shape is curved such that the shadow is on the top side                                    |
| Worm (Abotele)                   | Spread all over the grass after a previous rain                                                          |
| Scorpion                         | When big black scorpions appear frequently on the farm                                                   |
| Clouds                           | A thick cloud appears at the eastern side of the sea                                                     |
| Ants                             | Carry their food or eggs to their holes                                                                  |
| Dew                              | If from mid-night to the following morning there is a lot of dews falling                                |

## 2. Farming Decisions that Were Made Using the Forecasts and Data

**Table S2.** Farming decisions that the co-produced experiment information has helped to support. It gives the percentage of decisions that were more of interest by the 28 participants (22 Farmers and 6 extension agents).

|                                                             | Prepare<br>land | Amount<br>of water<br>to allocate | Seeding/<br>transpla<br>nt | Fertilizing | Pesticide<br>applicati<br>on | Labor/we<br>eding | Othe<br>rs |
|-------------------------------------------------------------|-----------------|-----------------------------------|----------------------------|-------------|------------------------------|-------------------|------------|
| Rainfall<br>monitoring data                                 | 64%             | 29%                               | 68%                        | 64%         | 50%                          | 61%               | 50%        |
| Daily forecasts<br>from farmers                             | 50%             | 25%                               | 57%                        | 50%         | 46%                          | 46%               | 50%        |
| Daily forecasts<br>from scientific<br>models<br>(meteoblue) | 57%             | 29%                               | 61%                        | 57%         | 46 %                         | 46%               | 50%        |

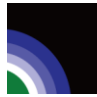

**Table S3.** Significance of the results on the engagement, usability, usefulness, understanding and decisions improvement when considering a binomial distribution for the medium and high categories of responses. (for farmers).

| Evaluation Metrics    | Digital Items or Tools         | Category Level            | Functionality | Number of Success | Total Number of Farmers | Probability | Success Probability | p-Value  | Sign<br>0.1<br>(+);<br>0.05 (*);<br>0.01 (**);<br>0.001 (***) |
|-----------------------|--------------------------------|---------------------------|---------------|-------------------|-------------------------|-------------|---------------------|----------|---------------------------------------------------------------|
| Engagement            |                                | Medium and High           |               | 15                | 22                      | 0.5         | 0.973761            | 0.026239 | *                                                             |
|                       |                                | Low                       |               | 7                 | 22                      | 0.5         | 0.0669              | 0.9331   |                                                               |
| Usability             | WeatherApp (After experiment)  | Somehow and Very easy     | Manipulation  | 16                | 22                      | 0.5         | 0.99155             | 0.00845  | **                                                            |
|                       |                                | Not easy and NA           |               | 6                 | 22                      | 0.5         | 0.026239            | 0.973761 |                                                               |
|                       | WhatsApp (After experiment)    | Somehow and Very easy     | Graphs        | 16                | 22                      | 0.5         | 0.99155             | 0.00845  | **                                                            |
|                       |                                | Not easy and NA           |               | 6                 | 22                      | 0.5         | 0.026239            | 0.973761 |                                                               |
|                       | Rain gauges (After experiment) | Somehow and Very easy     | Reporting     | 15                | 22                      | 0.5         | 0.973761            | 0.026239 | *                                                             |
|                       |                                | Not easy and NA           |               | 7                 | 22                      | 0.5         | 0.0669              | 0.9331   |                                                               |
| Usefulness /Relevance | Tools                          | Somehow and Very Relevant | Internet      | 14                | 22                      | 0.5         | 0.9331              | 0.0669   | +                                                             |
|                       |                                | Not Relevant and NA       |               | 8                 | 22                      | 0.5         | 0.143139            | 0.856861 |                                                               |
|                       |                                | Somehow and Very Relevant | Rain gauge    | 18                | 22                      | 0.5         | 0.999572            | 0.000428 | ***                                                           |
|                       |                                | Not Relevant and NA       |               | 5                 | 22                      | 0.5         | 0.00845             | 0.99155  |                                                               |
|                       |                                | Somehow and Very Relevant | Smartphone    | 17                | 22                      | 0.5         | 0.997828            | 0.002172 | **                                                            |
|                       |                                | Not Relevant and NA       |               | 6                 | 22                      | 0.5         | 0.026239            | 0.973761 |                                                               |
|                       |                                | Somehow and Very Relevant | WeatherApp    | 18                | 22                      | 0.5         | 0.999572            | 0.000428 | ***                                                           |
|                       |                                | Not Relevant and NA       |               | 5                 | 22                      | 0.5         | 0.00845             | 0.99155  |                                                               |
|                       |                                | Somehow and Very          | WhatsApp      | 16                | 22                      | 0.5         | 0.99155             | 0.00845  | **                                                            |

|                   |                                     | Relevant                       |                |    |     |        |          |          |     |
|-------------------|-------------------------------------|--------------------------------|----------------|----|-----|--------|----------|----------|-----|
|                   |                                     | Not Relevant and NA            | 7              | 22 | 0.5 | 0.0669 | 0.9331   |          |     |
| Understand<br>ing | Information and<br>data co-produced | Somehow and Very<br>Relevant   | local forecast | 18 | 22  | 0.5    | 0.999572 | 0.000428 | *** |
|                   |                                     | Not Relevant and NA            |                | 5  | 22  | 0.5    | 0.00845  | 0.99155  |     |
|                   |                                     | Somehow and Very<br>Relevant   | rainfall data  | 18 | 22  | 0.5    | 0.999572 | 0.000428 | *** |
|                   |                                     | Not Relevant and NA            |                | 5  | 22  | 0.5    | 0.00845  | 0.99155  |     |
|                   |                                     | Somehow and Very easy          | Scientific     | 18 | 22  | 0.5    | 0.999572 | 0.000428 | *** |
|                   |                                     | Not relevant and NA            | forecast       | 5  | 22  | 0.5    | 0.00845  | 0.99155  |     |
|                   | Forecast<br>uncertainty             | Somehow and highly<br>improved |                | 18 | 22  | 0.5    | 0.999572 | 0.000428 | *** |
|                   |                                     | Not improve and NA             |                | 5  | 22  | 0.5    | 0.00845  | 0.99155  |     |
|                   | Rainfall<br>distribution            | Somehow and highly<br>improved |                | 18 | 22  | 0.5    | 0.999572 | 0.000428 | *** |
|                   |                                     | Not improve and NA             |                | 5  | 22  | 0.5    | 0.00845  | 0.99155  |     |
|                   | Decisions                           | Somehow and highly<br>improved |                | 18 | 22  | 0.5    | 0.999572 | 0.000428 | *** |
|                   |                                     | Not improve and NA             |                | 5  | 22  | 0.5    | 0.00845  | 0.99155  |     |



**Table S4.** Significance of the results on the engagement, usability, usefulness, understanding and decisions improvement when considering a binomial distribution for the medium and high categories of responses (for extension agents).

| Evaluation Metrics    | Digital Items or Tools           | Category Level            | Functionality  | Number of Success | Total Number of Farmers | Probability | Success Probability | p-Value  | Significance<br>0.1 (+);<br>0.05 (*);<br>0.01 (**);<br>0.001 (***) |
|-----------------------|----------------------------------|---------------------------|----------------|-------------------|-------------------------|-------------|---------------------|----------|--------------------------------------------------------------------|
| Usefulness /Relevance | Tools                            | Somehow and Very Relevant | Internet       | 3                 | 6                       | 0.5         | 0.65625             | 0.34375  |                                                                    |
|                       |                                  | Not Relevant and NA       |                | 3                 | 6                       | 0.5         | 0.65625             | 0.34375  |                                                                    |
|                       |                                  | Somehow and Very Relevant | Rain gauge     | 4                 | 6                       | 0.5         | 0.890625            | 0.109375 | +                                                                  |
|                       |                                  | Not Relevant and NA       |                | 2                 | 6                       | 0.5         | 0.34375             | 0.65625  |                                                                    |
|                       |                                  | Somehow and Very Relevant | Smartphone     | 6                 | 6                       | 0.5         | 1                   | 0        | ***                                                                |
|                       |                                  | Not Relevant and NA       |                | 0                 | 6                       | 0.5         | 0.015625            | 0.984375 |                                                                    |
|                       |                                  | Somehow and Very Relevant | WeatherApp     | 6                 | 6                       | 0.5         | 1                   | 0        | ***                                                                |
|                       |                                  | Not Relevant and NA       |                | 0                 | 6                       | 0.5         | 0.015625            | 0.984375 |                                                                    |
|                       |                                  | Somehow and Very Relevant | WhatsApp       | 6                 | 6                       | 0.5         | 1                   | 0        | ***                                                                |
|                       |                                  | Not Relevant and NA       |                | 0                 | 6                       | 0.5         | 0.015625            | 0.984375 |                                                                    |
|                       | Information and data co-produced | Somehow and Very Relevant | local forecast | 6                 | 6                       | 0.5         | 1                   | 0        | ***                                                                |
|                       |                                  | Not Relevant and NA       |                | 0                 | 6                       | 0.5         | 0.015625            | 0.984375 |                                                                    |
|                       |                                  | Somehow and Very Relevant | rainfall data  | 6                 | 6                       | 0.5         | 1                   | 0        | ***                                                                |
|                       |                                  | Not Relevant and NA       |                | 0                 | 6                       | 0.5         | 0.015625            | 0.984375 |                                                                    |

|               |                       |                             |                     |   |   |     |          |          |     |
|---------------|-----------------------|-----------------------------|---------------------|---|---|-----|----------|----------|-----|
| Understanding |                       | Somehow and Very easy       | Scientific forecast | 6 | 6 | 0.5 | 1        | 0        | *** |
|               |                       | Not relevant and NA         |                     | 0 | 6 | 0.5 | 0.015625 | 0.984375 |     |
|               | Forecast uncertainty  | Somehow and highly improved |                     | 6 | 6 | 0.5 | 1        | 0        | *** |
|               |                       | Not improve and NA          |                     | 0 | 6 | 0.5 | 0.015625 | 0.984375 |     |
|               | Rainfall distribution | Somehow and highly improved |                     | 6 | 6 | 0.5 | 1        | 0        | *** |
|               |                       | Not improve and NA          |                     | 0 | 6 | 0.5 | 0.015625 | 0.984375 |     |
|               | Decisions             | Somehow and highly improved |                     | 6 | 6 | 0.5 | 1        | 0        | *** |
|               |                       | Not improve and NA          |                     | 0 | 6 | 0.5 | 0.015625 | 0.984375 |     |

### 3. Statistics on Messages Received via the WhatsApp Group

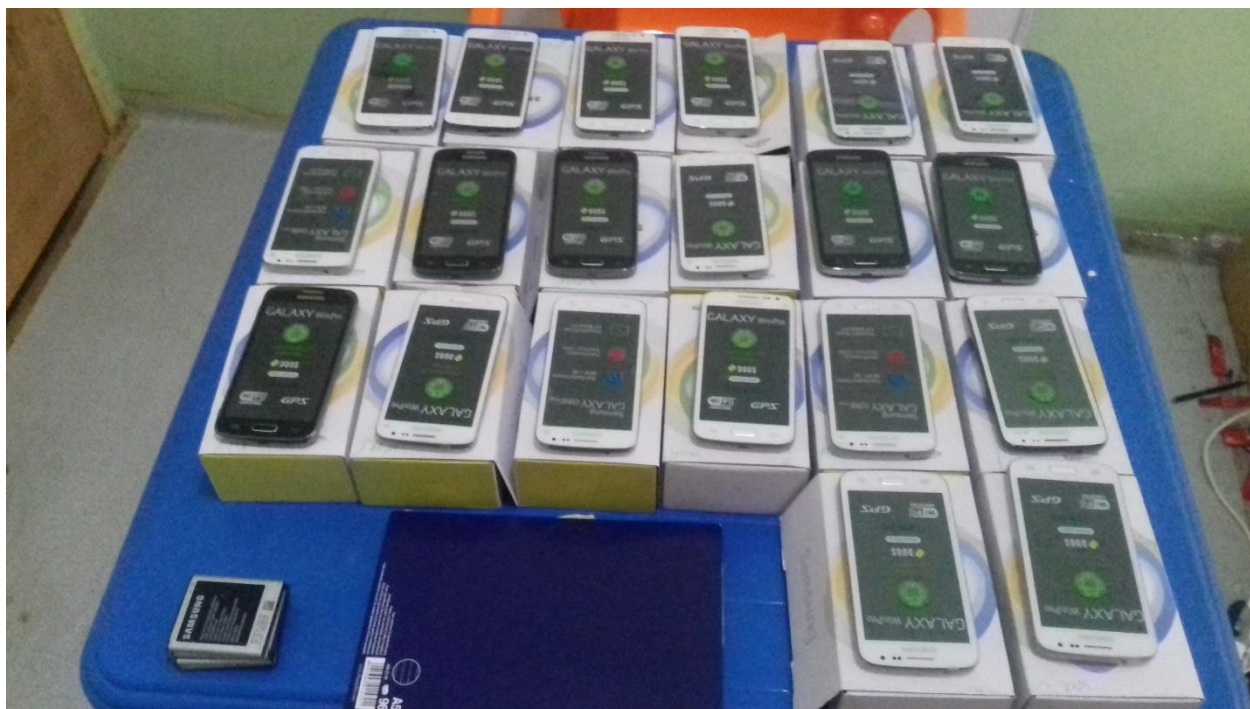

**Figure S1.** Sample photos of the smartphones used by farmers and extension agents.

**Table S5.** Count of messages, pictures and emojis exchanged via the WhatsApp group.

| Months                           | Messages | Pictures/Graphs (forecasts) | Emojis exchanges |
|----------------------------------|----------|-----------------------------|------------------|
| April                            | 164      | 33                          | 92               |
| May                              | 324      | 70                          | 103              |
| June                             | 154      | 61                          | 62               |
| July                             | 93       | 35                          | 30               |
| Total (5th April–17th July 2019) | 736      | 199                         | 287              |

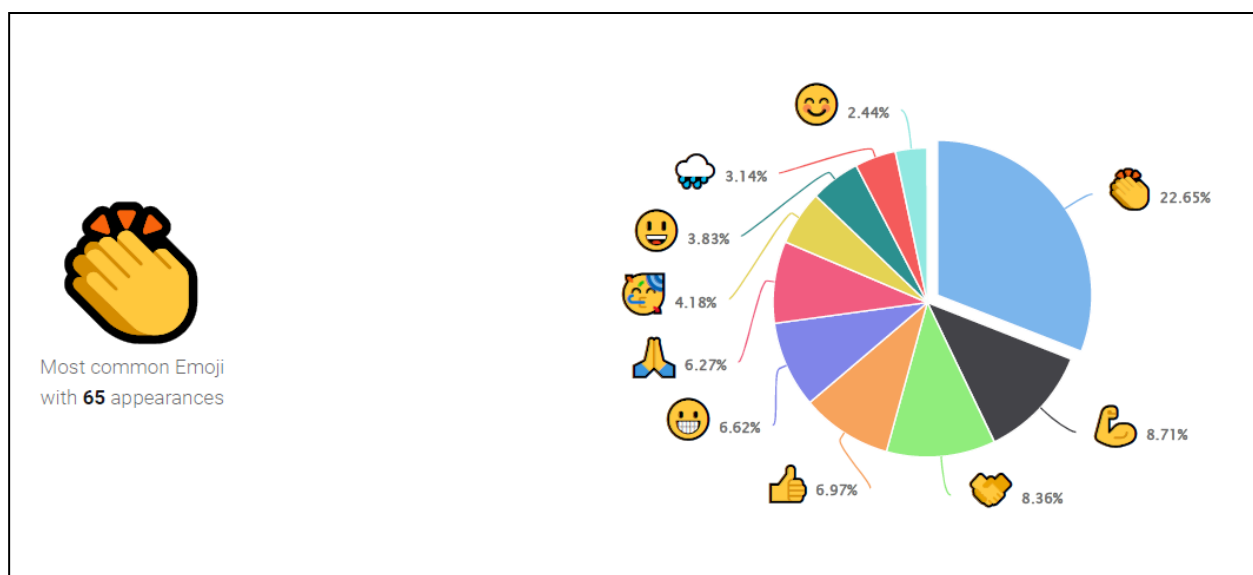

**Figure S2.** Statistics on emojis shared in the WhatsApp group.

#### 4. Technical Reports on Issues by Socio-Demographic Characteristics (Age, Gender and Literacy)

**Table S6.** Analysis of the technical issues reported by age, gender and literacy level from a total of 92 technical issues recorded during the testing phase.

|                                                                           | Age                          |                        | Gender |        | Literacy                 |                            |
|---------------------------------------------------------------------------|------------------------------|------------------------|--------|--------|--------------------------|----------------------------|
|                                                                           | Young Farmers<br>(≤49 years) | Elder Farmers<br>(≥50) | Male   | Female | Primary School and Below | Secondary School and Above |
| Number of farmers                                                         | 12                           | 10                     | 18     | 4      | 5                        | 17                         |
| Technical issues reports<br>(smartphone use, apps, and internet handling) | 35                           | 57                     | 76     | 16     | 27                       | 65                         |
| Technical difficulty ratio (Total issues reported/Number of farmers)      | 2.92                         | 5.7                    | 4.22   | 4.00   | 5.40                     | 3.82                       |



## 5. FarmerSupport Mobile APP Developed Based on Insight From this Study

|                                                                                                                                   |                                                                                                                                                                                                                                        |
|-----------------------------------------------------------------------------------------------------------------------------------|----------------------------------------------------------------------------------------------------------------------------------------------------------------------------------------------------------------------------------------|
|                                                  |                                                                                                                                                      |
| <p><b>FarmerSupport APP:</b> Local forecast indicators collection by farmer in the study areas used for rainfall forecasting.</p> | <p><b>FarmerSupport APP:</b> Local Forecast tab. This is the result of combining the local indicator used by farmers. The use of the pie-diagram format, depicting probabilities, has proven to be understandable for Ada farmers.</p> |
|                                                |                                                                                                                                                    |
| <p><b>FarmerSupport APP:</b> Scientific Forecast tab, based on Meteoblue forecasts.</p>                                           | <p><b>FarmerSupport APP:</b> Hybrid Forecast tab. Putting together the Meteoblue forecasts with the farmer's forecast.</p>                                                                                                             |

**Figure S3.** Details on the integrated APP developed under the Waterapps project (based on lessons from the present study) and which is available on google play store (<https://play.google.com/store/apps/details?id=com.spacewek.farmersupport>).
